# Supplementary material
Source: Research Square preprint supplement (doi:10.21203/rs.3.rs-9242132/v1)
Supplement: Supplementary file 1 [file 2e4581e135b23319c3cdc689.docx]

**Tabel 1. Baseline comparison of ultrasound parameters and clinical indicators between BA group and non BA group**

| Variable | Total sample（*N* = 197） | BA group（*N* = 67） | Non BAgroup（*N* = 130） | *P* value |
| --- | --- | --- | --- | --- |
| Age (days) | 46.00 (11.00-92.00) | 56.00 (11.50-87.50) | 43.00 (9.25-94.25) | 0.058 |
| Gender |  |  |  | 0.490§ |
| Male | 105 (53.30%) | 38 (56.72%) | 67 (51.54%) |  |
| Female | 92 (46.70%) | 29 (43.28%) | 63 (48.46%) |  |
| GGT value (IU/L) | 221.00 (130.00-431.00) | 554.00 (242.50-580.00) | 156.00 (111.50-272.75) | < 0.001* |
| TB (mg/dL) | 153.39 (101.86-190.37) | 177.21 (131.62-191.65) | 142.81 (84.27-178.35) | 0.025 * |
| DB (mg/dL) | 39.59 (16.54-85.60) | 94.60 (52.12-127.66) | 26.38 (11.33-58.05) | 0.035* |
| L (mm) | 24.00 (18.00-29.00) | 14.00 (11.00-18.00) | 28.00 (24.00-30.00) | < 0.001* |
| W (mm) | 7.00 (5.00-8.00) | 5.00 (3.00-8.00) | 7.50 (6.00-9.00) | 0.042* |
| HA (mm) | 1.90 (1.20-2.30) | 2.20 (1.90-2.50) | 1.50 (1.10-2.20) | 0.049* |
| CPPUMA (%) | 60.22 (53.25-69.05) | 71.74 (68.81-76.87) | 54.24 (51.75-60.20) | < 0.001* |
| E (kPa) | 6.20 (5.00-7.60) | 8.50 (6.54-11.92) | 5.70 (4.80-6.60) | < 0.001* |
| GCR (%) | 75.00 (57.00-85.00) | 33.30 (0.00-70.00) | 82.00 (72.25-90.00) | < 0.001* |
| Note:Categorical variables are expressed in frequency (percentage), while other variables are expressed in median and interquartile range (25th and 75th percentiles).  GGT=γ-Glutamyl transpeptidase, TB=Total bilirubin, DB=Direct bilirubin, L=Maximum length of gallbladder, W= Maximum width of gallbladder, HA=Hepatic artery, CPPUMA=Color pixel percentage measured by Ultra Micro Angiography, E=liver tissue elasticity value, GCR=gallbladder contraction rate, BA=biliary atresia.  §Fisher exact test was used for statistical comparison. Otherwise, Mann-Whitney U test was used for statistical comparison.  * Indicates statistical significance; *P* <0.05. | | | | |

**Tabel 2. Baseline comparison of ultrasound parameters and clinical indicators of patients between training and validation sets**

| Variable | Training set（*N* = 137） | Validation set（*N* = 60） | *P* value |
| --- | --- | --- | --- |
| Group |  |  | > 0.99§ |
| Non BA | 90 (65.69%) | 40 (66.67%) |  |
| BA | 47 (34.31%) | 20 (33.33%) |  |
| Age(days) | 49.00 (11.00-102.00) | 41.50 (11.50-81.00) | 0.761 |
| Gender |  |  | 0.914§ |
| Male | 66 (48.18%) | 39 (65.00%) |  |
| Female | 71 (51.82%) | 21 (35.00%) |  |
| GGT value(IU/L) | 199.00 (121.00-450.00) | 272.50 (156.00-347.25) | 0.206 |
| TB(mg/dL) | 158.78 (121.62-190.37) | 139.98 (75.23-188.77) | 0.051 |
| DB(mg/dL) | 50.15 (22.55-93.96) | 31.64 (10.61-72.23) | 0.022 |
| L(mm) | 24.00 (18.00-29.00) | 23.50 (17.00-28.00) | 0.312 |
| W(mm) | 7.00 (5.00-9.00) | 7.00 (5.00-8.00) | 0.987 |
| HA(mm) | 1.90 (1.20-2.30) | 1.95 (1.38-2.42) | 0.376 |
| CPPUMA(%) | 61.52 (53.73-69.66) | 58.40 (51.01-68.25) | 0.077 |
| E(kPa) | 6.30 (5.04-8.18) | 5.90 (4.97-6.80) | 0.065 |
| GCR(%) | 75.00 (57.00-84.00) | 77.50 (58.25-88.25) | 0.371 |
| Note:Categorical variables are expressed in frequency (percentage), while other variables are expressed in median and interquartile range (25th and 75th percentiles).  GGT=γ-Glutamyl transpeptidase, TB=Total bilirubin, DB=Direct bilirubin, L=Maximum length of gallbladder, W= Maximum width of gallbladder, HA=Hepatic artery, CPPUMA=Color pixel percentage measured by Ultra Micro Angiography, E=liver tissue elasticity value, GCR=gallbladder contraction rate, BA=biliary atresia.  §Fisher exact test or Pearson χ2 test,Otherwise, Mann-Whitney U test was used for statistical comparison. | | | |

**Tabel 3. Univariate and multivariate regression analyses**

| Variable | Univariate regression | | Multivariate regression | |
| --- | --- | --- | --- | --- |
| OR (95% CI) | *P* value | OR (95% CI) | *P* value |
| Age (days) | 1.011 (0.995 1.005) | 0.902 |  |  |
| Gender |  |  |  |  |
| Male | Reference |  |  |  |
| Female | 0.652 (0.452, 0.972) | 0.045 | 0.550 (0.206, 1.466) | 0.232 |
| GGT value(IU/L) | 1.530 (1.224, 1.969) | 0.020 | 1.304 (1.101, 1.517) | 0.011* |
| TB (mg/dL) | 0.999 (0.992, 1.006) | 0.755 |  |  |
| DB (mg/dL) | 1.003 (0.957, 1.035) | 0.219 |  |  |
| L (mm) | 0.884 (0.841, 0.937) | 0.031 | 0.906 (0.892, 0.964) | 0.023* |
| W (mm) | 0.956 (0.925, 1.050) | 0.103 |  |  |
| HA (mm) | 1.016 (0.897, 1.150) | 0.805 |  |  |
| CPPUMA (%) | 1.135 (1.011, 1.269) | 0.040 | 1.063 (1.011, 1.164) | 0.031* |
| E (kPa) | 1.177 (1.049, 1.450) | 0.037 | 1.118 (1.037, 1.418) | 0.029* |
| GCR (%) | 0.978 (0.967, 0.988) | 0.043 | 0.972 (0.965, 0.993) | 0.036* |
| Note:*P*-value represents the comparison between BA patients and non BA patients in the training set.  GGT=γ-Glutamyl transpeptidase, TB=Total bilirubin, DB=Direct bilirubin, L=Maximum length of gallbladder, W=Maximum width of gallbladder, HA=Hepatic artery, CPPUMA=Color pixel percentage measured by Ultra Micro Angiography, E =liver tissue elasticity value, GCR =gallbladder contraction rate, BA=biliary atresia.  * Indicates statistical significance; *P* <0.05. | | | | |
